# Supplementary material
Source: MDPI journal article supplement (https://www.mdpi.com/2075-4701/10/11/1402)
Supplement: s1 [file s1]

# Supplementary Materials

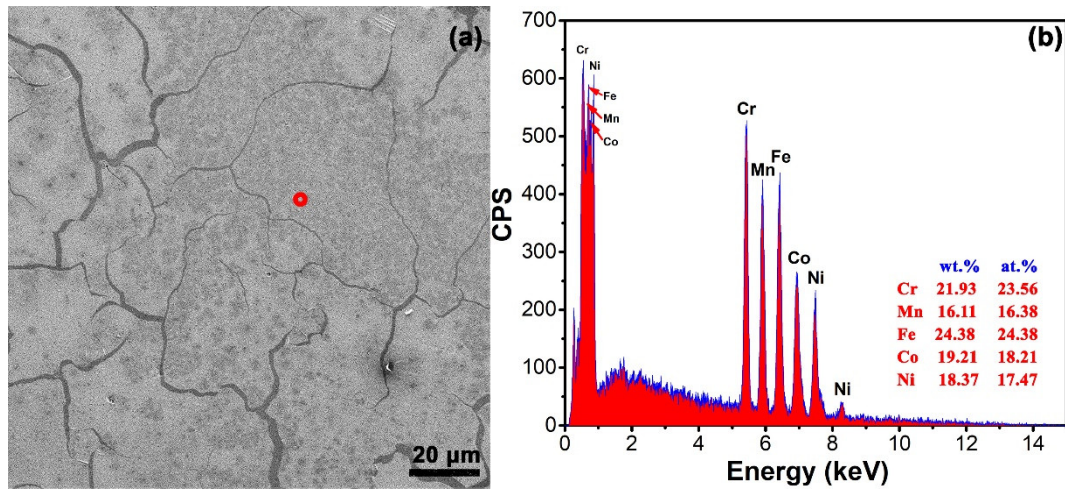

Figure S1. Microstructure of base (a) and EDS spectrum of position with marker (○) (b).

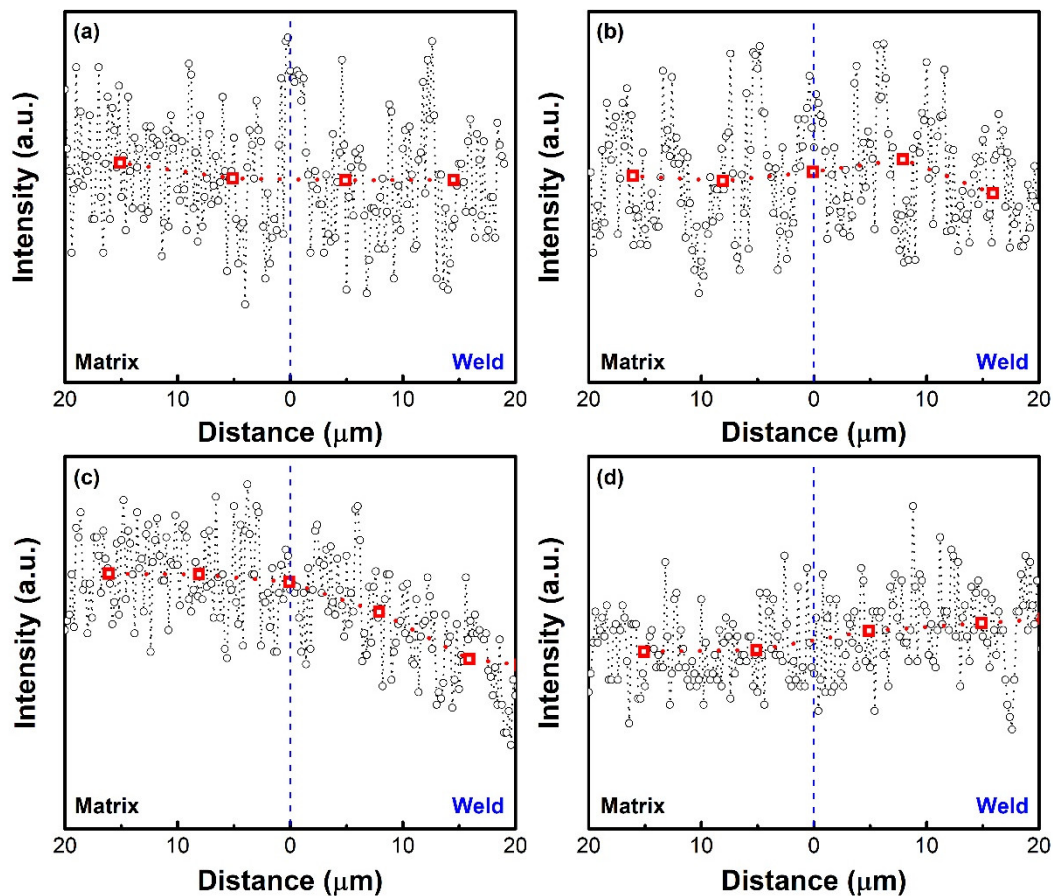

Figure S2. Compositional transition from matrix to weld of Mn element ((a) W1; (b) W2 and (c) W3) and that of Al element for W3 (d). (the scale “0” denotes the fusion line in each weld).

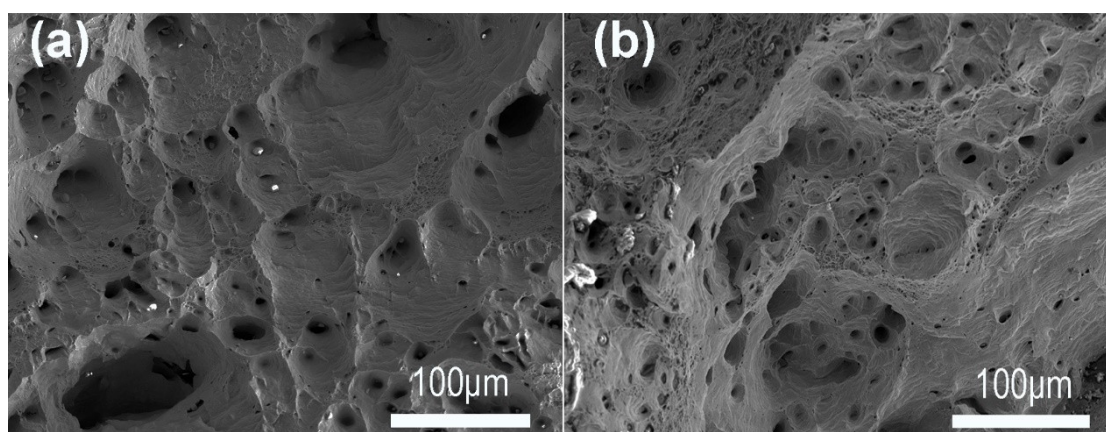

**Figure S3.** Fractographies contrast of base (a) and W1 (b).

**Table S1.** the tensile properties of base and weldments.

| Sample | Yield Strength<br>(MPa) | Ultimate Tensile Strength<br>(MPa) | Elongation<br>(%) | $\sigma_{UTS(weld)}/\sigma_{UTS(base)}$ |
|--------|-------------------------|------------------------------------|-------------------|-----------------------------------------|
| Base   | 295.1                   | 695.8                              | 22.3              | /                                       |
| W1     | 303.1                   | 610.9                              | 19.5              | 87.8                                    |
| W2     | 330.5                   | 615.9                              | 14.5              | 88.5                                    |
| W3     | 317.6                   | 566.8                              | 15.8              | 81.5                                    |

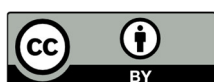

© 2020 by the authors. Licensee MDPI, Basel, Switzerland. This article is an open access article distributed under the terms and conditions of the Creative Commons Attribution (CC BY) license (<http://creativecommons.org/licenses/by/4.0/>).
